# Supplementary material for: Bioactive Betulin and PEG Based Polyanhydrides for Use in Drug Delivery Systems
Source: PubMed Central journal article supplement (PMC7865682; doi:10.3390/ijms22031090), 2021-01-22
Supplement: ijms-22-01090-s001.pdf [file ijms-22-01090-s001.pdf]

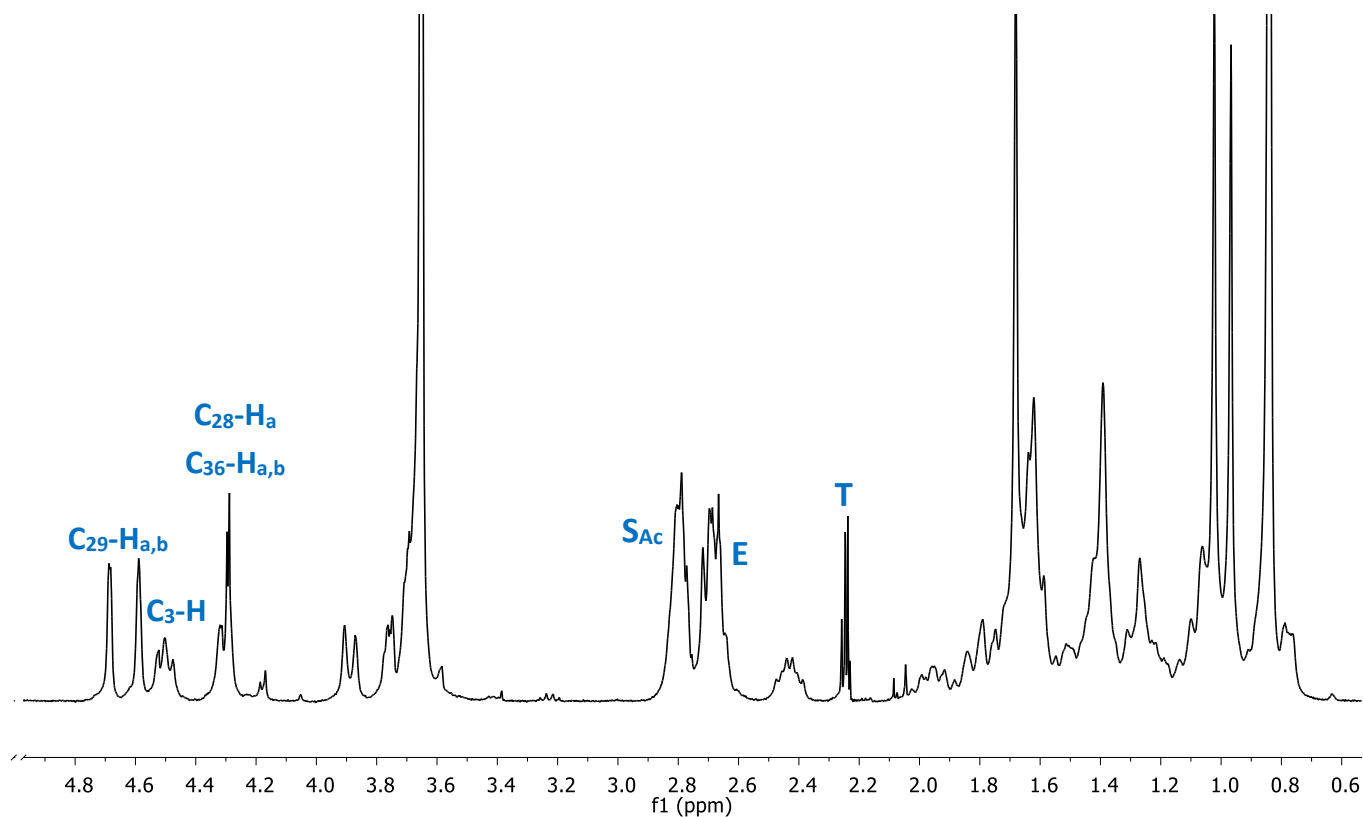

Figure S1.  $^1\text{H}$  NMR spectrum of polyDBB\_PEG

Formulas used to calculate the molecular weight of polymers by  $^1\text{H}$  NMR:

$$M_w = n_{DBB}M_{DBB} + n_{PEG}M_{PEG} + M_T$$

$$I_{[1H]DBB} = (I_{C29-Ha} + I_{C29-Hb} + I_{C3-H} + I_{SAc} + I_E)/11$$

$$I_{[1H]T} = I_T/6$$

$$I_{[1H]PEG} = (I_{\delta=4.3\text{ ppm}} - I_{[1H]DBB})/4$$

$$n_{DBB} = \frac{I_{[1H]DBB}}{I_{[1H]T}}$$

$$n_{PEG} = \frac{I_{[1H]PEG}}{I_{[1H]T}}$$

where:

$M_{DBB}$ —molar mass of repeating unit of DBB in polyanhydride equal to 642.86g/mol,

$M_{PEG}$ —molar mass of repeating unit of PEG equal to 250 or 600 g/mol,

$M_T$ — molar mass of terminal groups (end groups) in polyanhydride equal to 102 g/mol (molar mass of acetic anhydride),

$I_{[1H]DBB}$ —intensity of one DBB proton,

$I_{[1H]PEG}$ — intensity of one PEG proton,

$I_{[1H]T}$  – intensity of one proton of end groups,

$I_{\delta = 4.30 \text{ ppm}}$  – intensity of signal of five protons ( $C_{28}\text{-H}_a$  and  $\text{-CH}_2\text{C(O)OC(O)-}$  in PEG),

$I_T$  – intensity of signal of terminal groups ( $\delta = 2.24 \text{ ppm}$ ),

$I_{(C_{29}\text{-H}_a)}$  and  $I_{(C_{29}\text{-H}_b)}$  – intensity of signal assigned to methylene protons at the double-bonded carbon ( $\delta = 4.68$  and  $4.59 \text{ ppm}$ ),

$I_{(C_3\text{-H})}$  – intensity of signal assigned to methine proton in the ring of betulin ( $\delta = 4.50 \text{ ppm}$ ),

$I_{SAC}$  – intensity of signal assigned to methylene protons in the anhydride moiety ( $\delta = 2.82\text{-}2.77 \text{ ppm}$ ),

$I_E$  – intensity of signal assigned to methylene protons in the ester moiety ( $\delta = 2.74\text{-}2.64 \text{ ppm}$ ).

Intensities of signals used to calculate the molecular weights of the polyanhydrides:

Table S1. Intensities of signals used to calculate the molecular weights of DBB\_PEG\_250\_20

| Signal                                          | Chemical shift $\delta$ [ppm] | Intensity | Assigned protons                                                                 |
|-------------------------------------------------|-------------------------------|-----------|----------------------------------------------------------------------------------|
| $C_3\text{-H}$                                  | 4.50                          | 1.52      | $\sim\text{CH}(\text{-OCO})\sim$                                                 |
| $C_{28}\text{-H}_a$ and $C_{36}\text{-H}_{a,b}$ | 4.30                          | 4.75      | $\sim\text{C-CH}_2\text{-O-CO-CH}_2\sim$ and $\text{-CH}_2\text{-C(O)OC(O)\sim}$ |
| $C_{29}\text{-H}_a$                             | 4,68                          | 1.30      | $\text{H}_2\text{C}=\text{C}(\text{-CH}_3)\text{-CH}\sim$                        |
| $C_{29}\text{-H}_b$                             | 4,59                          | 1.40      |                                                                                  |
| SAC                                             | 2.82-2.77                     | 5.76      | $\text{-OCOOC-CH}_2\text{-CH}_2\text{-COO-}$                                     |
| E                                               | 2.74-2.64                     | 6.33      | $\text{-OCOOC-CH}_2\text{-CH}_2\text{-COO-}$                                     |
| T                                               | 2.24                          | 0.77      | end groups                                                                       |

Table S2. Intensities of signals used to calculate the molecular weights of DBB\_PEG\_250\_40

| Signal                                          | Chemical shift $\delta$ [ppm] | Intensity | Assigned protons                                                                 |
|-------------------------------------------------|-------------------------------|-----------|----------------------------------------------------------------------------------|
| $C_3\text{-H}$                                  | 4.50                          | 1.12      | $\sim\text{CH}(\text{-OCO})\sim$                                                 |
| $C_{28}\text{-H}_a$ and $C_{36}\text{-H}_{a,b}$ | 4.30                          | 9.22      | $\sim\text{C-CH}_2\text{-O-CO-CH}_2\sim$ and $\text{-CH}_2\text{-C(O)OC(O)\sim}$ |
| $C_{29}\text{-H}_a$                             | 4,68                          | 0.83      | $\text{H}_2\text{C}=\text{C}(\text{-CH}_3)\text{-CH}\sim$                        |
| $C_{29}\text{-H}_b$                             | 4,59                          | 1.04      |                                                                                  |
| SAC                                             | 2.82-2.77                     | 4.82      | $\text{-OCOOC-CH}_2\text{-CH}_2\text{-COO-}$                                     |
| E                                               | 2.74-2.64                     | 5.30      | $\text{-OCOOC-CH}_2\text{-CH}_2\text{-COO-}$                                     |
| T                                               | 2.24                          | 1.26      | end groups                                                                       |

Table S3. Intensities of signals used to calculate the molecular weights of DBB\_PEG\_250\_60

| Signal                                          | Chemical shift $\delta$ [ppm] | Intensity | Assigned protons                                                                 |
|-------------------------------------------------|-------------------------------|-----------|----------------------------------------------------------------------------------|
| $C_3\text{-H}$                                  | 4.50                          | 0.76      | $\sim\text{CH}(\text{-OCO})\sim$                                                 |
| $C_{28}\text{-H}_a$ and $C_{36}\text{-H}_{a,b}$ | 4.30                          | 14.79     | $\sim\text{C-CH}_2\text{-O-CO-CH}_2\sim$ and $\text{-CH}_2\text{-C(O)OC(O)\sim}$ |
| $C_{29}\text{-H}_a$                             | 4,68                          | 0.54      | $\text{H}_2\text{C}=\text{C}(\text{-CH}_3)\text{-CH}\sim$                        |
| $C_{29}\text{-H}_b$                             | 4,59                          | 0.67      |                                                                                  |
| SAC                                             | 2.82-2.77                     | 3.79      | $\text{-OCOOC-CH}_2\text{-CH}_2\text{-COO-}$                                     |
| E                                               | 2.74-2.64                     | 4.22      | $\text{-OCOOC-CH}_2\text{-CH}_2\text{-COO-}$                                     |
| T                                               | 2.24                          | 1.04      | end groups                                                                       |

Table S4. Intensities of signals used to calculate the molecular weights of DBB\_PEG\_250\_80

| Signal                                                                | Chemical shift $\delta$ [ppm] | Intensity | Assigned protons                                                               |
|-----------------------------------------------------------------------|-------------------------------|-----------|--------------------------------------------------------------------------------|
| C <sub>3</sub> -H                                                     | 4.50                          | 0.80      | ~CH(-OCO)~                                                                     |
| C <sub>28</sub> -H <sub>a</sub> and C <sub>36</sub> -H <sub>a,b</sub> | 4.30                          | 19.61     | ~C-CH <sub>2</sub> -O-CO-CH <sub>2</sub> ~ and<br>-CH <sub>2</sub> -C(O)OC(O)~ |
| C <sub>29</sub> -H <sub>a</sub>                                       | 4,68                          | 0.75      | H <sub>2</sub> C=C(-CH <sub>3</sub> )-CH~                                      |
| C <sub>29</sub> -H <sub>b</sub>                                       | 4,59                          | 0.76      |                                                                                |
| SAC                                                                   | 2.82-2.77                     | 2.64      | -OCOOC-CH <sub>2</sub> -CH <sub>2</sub> -COO-                                  |
| E                                                                     | 2.74-2.64                     | 2.75      | -OCOOC-CH <sub>2</sub> -CH <sub>2</sub> -COO-                                  |
| T                                                                     | 2.24                          | 1.07      | end groups                                                                     |

Table S5. Intensities of signals used to calculate the molecular weights of DBB\_PEG\_600\_20

| Signal                                                                | Chemical shift $\delta$ [ppm] | Intensity | Assigned protons                                                               |
|-----------------------------------------------------------------------|-------------------------------|-----------|--------------------------------------------------------------------------------|
| C <sub>3</sub> -H                                                     | 4.50                          | 1.25      | ~CH(-OCO)~                                                                     |
| C <sub>28</sub> -H <sub>a</sub> and C <sub>36</sub> -H <sub>a,b</sub> | 4.30                          | 2.44      | ~C-CH <sub>2</sub> -O-CO-CH <sub>2</sub> ~ and<br>-CH <sub>2</sub> -C(O)OC(O)~ |
| C <sub>29</sub> -H <sub>a</sub>                                       | 4,68                          | 1.16      | H <sub>2</sub> C=C(-CH <sub>3</sub> )-CH~                                      |
| C <sub>29</sub> -H <sub>b</sub>                                       | 4,59                          | 1.27      |                                                                                |
| SAC                                                                   | 2.82-2.77                     | 4.85      | -OCOOC-CH <sub>2</sub> -CH <sub>2</sub> -COO-                                  |
| E                                                                     | 2.74-2.64                     | 6.77      | -OCOOC-CH <sub>2</sub> -CH <sub>2</sub> -COO-                                  |
| T                                                                     | 2.24                          | 0.35      | end groups                                                                     |

Table S6. Intensities of signals used to calculate the molecular weights of DBB\_PEG\_600\_40

| Signal                                                                | Chemical shift $\delta$ [ppm] | Intensity | Assigned protons                                                               |
|-----------------------------------------------------------------------|-------------------------------|-----------|--------------------------------------------------------------------------------|
| C <sub>3</sub> -H                                                     | 4.50                          | 0.91      | ~CH(-OCO)~                                                                     |
| C <sub>28</sub> -H <sub>a</sub> and C <sub>36</sub> -H <sub>a,b</sub> | 4.30                          | 3.48      | ~C-CH <sub>2</sub> -O-CO-CH <sub>2</sub> ~ and<br>-CH <sub>2</sub> -C(O)OC(O)~ |
| C <sub>29</sub> -H <sub>a</sub>                                       | 4,68                          | 0.76      | H <sub>2</sub> C=C(-CH <sub>3</sub> )-CH~                                      |
| C <sub>29</sub> -H <sub>b</sub>                                       | 4,59                          | 0.85      |                                                                                |
| SAC                                                                   | 2.82-2.77                     | 4.24      | -OCOOC-CH <sub>2</sub> -CH <sub>2</sub> -COO-                                  |
| E                                                                     | 2.74-2.64                     | 4.67      | -OCOOC-CH <sub>2</sub> -CH <sub>2</sub> -COO-                                  |
| T                                                                     | 2.24                          | 0.41      | end groups                                                                     |

Table S7. Intensities of signals used to calculate the molecular weights of DBB\_PEG\_600\_60

| Signal                                                                | Chemical shift $\delta$ [ppm] | Intensity | Assigned protons                                                               |
|-----------------------------------------------------------------------|-------------------------------|-----------|--------------------------------------------------------------------------------|
| C <sub>3</sub> -H                                                     | 4.50                          | 0.85      | ~CH(-OCO)~                                                                     |
| C <sub>28</sub> -H <sub>a</sub> and C <sub>36</sub> -H <sub>a,b</sub> | 4.30                          | 4.92      | ~C-CH <sub>2</sub> -O-CO-CH <sub>2</sub> ~ and<br>-CH <sub>2</sub> -C(O)OC(O)~ |
| C <sub>29</sub> -H <sub>a</sub>                                       | 4,68                          | 0.73      | H <sub>2</sub> C=C(-CH <sub>3</sub> )-CH~                                      |
| C <sub>29</sub> -H <sub>b</sub>                                       | 4,59                          | 0.74      |                                                                                |
| SAC                                                                   | 2.82-2.77                     | 2.95      | -OCOOC-CH <sub>2</sub> -CH <sub>2</sub> -COO-                                  |
| E                                                                     | 2.74-2.64                     | 3.41      | -OCOOC-CH <sub>2</sub> -CH <sub>2</sub> -COO-                                  |
| T                                                                     | 2.24                          | 0.81      | end groups                                                                     |

Table S8. Intensities of signals used to calculate the molecular weights of DBB\_PEG\_600\_80

| Signal                                                                | Chemical shift<br>$\delta$ [ppm] | Intensity | Assigned protons                                                               |
|-----------------------------------------------------------------------|----------------------------------|-----------|--------------------------------------------------------------------------------|
| C <sub>3</sub> -H                                                     | 4.50                             | 0.12      | ~CH(-OCO)~                                                                     |
| C <sub>28</sub> -H <sub>a</sub> and C <sub>36</sub> -H <sub>a,b</sub> | 4.30                             | 2.83      | ~C-CH <sub>2</sub> -O-CO-CH <sub>2</sub> ~ and<br>-CH <sub>2</sub> -C(O)OC(O)~ |
| C <sub>29</sub> -H <sub>a</sub>                                       | 4,68                             | 0.12      | H <sub>2</sub> C=C(-CH <sub>3</sub> )-CH~                                      |
| C <sub>29</sub> -H <sub>b</sub>                                       | 4,59                             | 0.13      |                                                                                |
| SAc                                                                   | 2.82-2.77                        | 0.59      | -OCOOC-CH <sub>2</sub> -CH <sub>2</sub> -COO-                                  |
| E                                                                     | 2.74-2.64                        | 0.78      | -OCOOC-CH <sub>2</sub> -CH <sub>2</sub> -COO-                                  |
| T                                                                     | 2.24                             | 0.06      | end groups                                                                     |
